# Supplementary figures and images for: Alternative transcription exceeds alternative splicing in generating the transcriptome diversity of cerebellar development
Source: HighWire-hosted journal article supplement (doi:10.1101/gr.120535.111), 2011-06-28

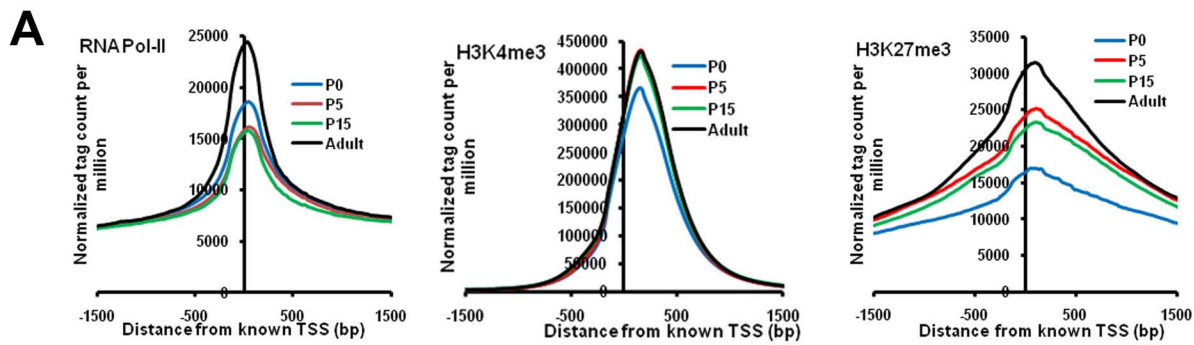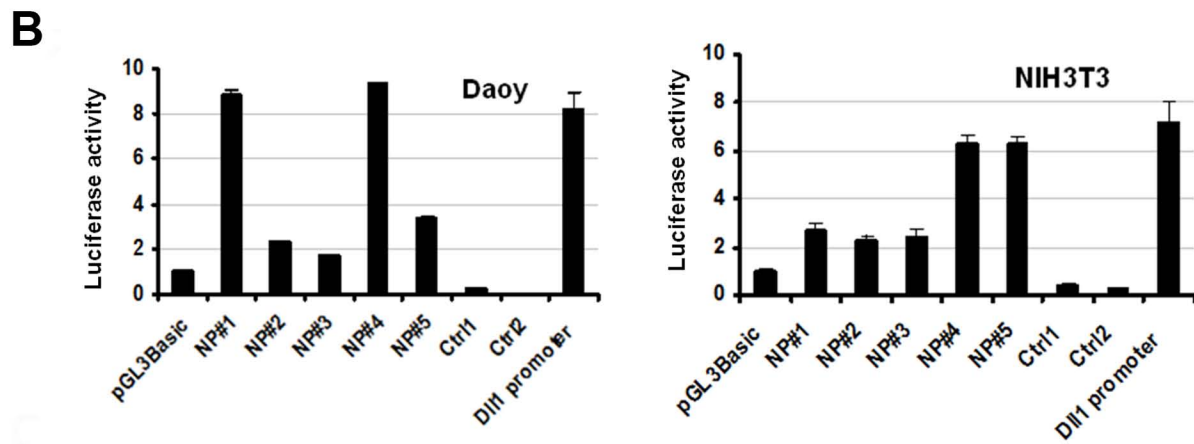

Supplement: Pal__Figure_S3.pdf [file Pal__Figure_S3.pdf]
